# Supplementary material
Source: ML conference proceedings conference paper supplement (https://openreview.net/forum?id=TLE2BRkdd8)

# Magnitude of min. perturbation invalidating robustified recourse

LR classifier

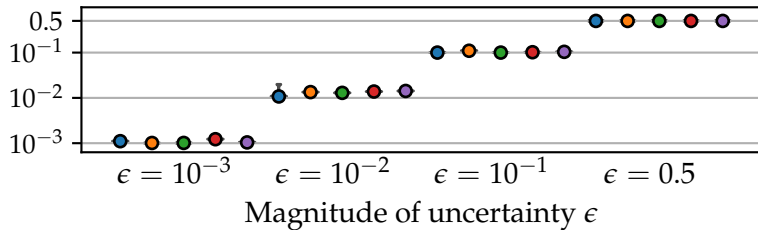

NN classifier

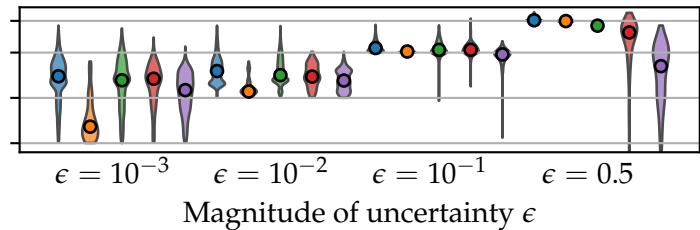

Supplement: supplementary_material [file attachment]
