# Supplementary material
Source: ML conference proceedings conference paper supplement (https://openreview.net/forum?id=TLE2BRkdd8)

# LR classifiers

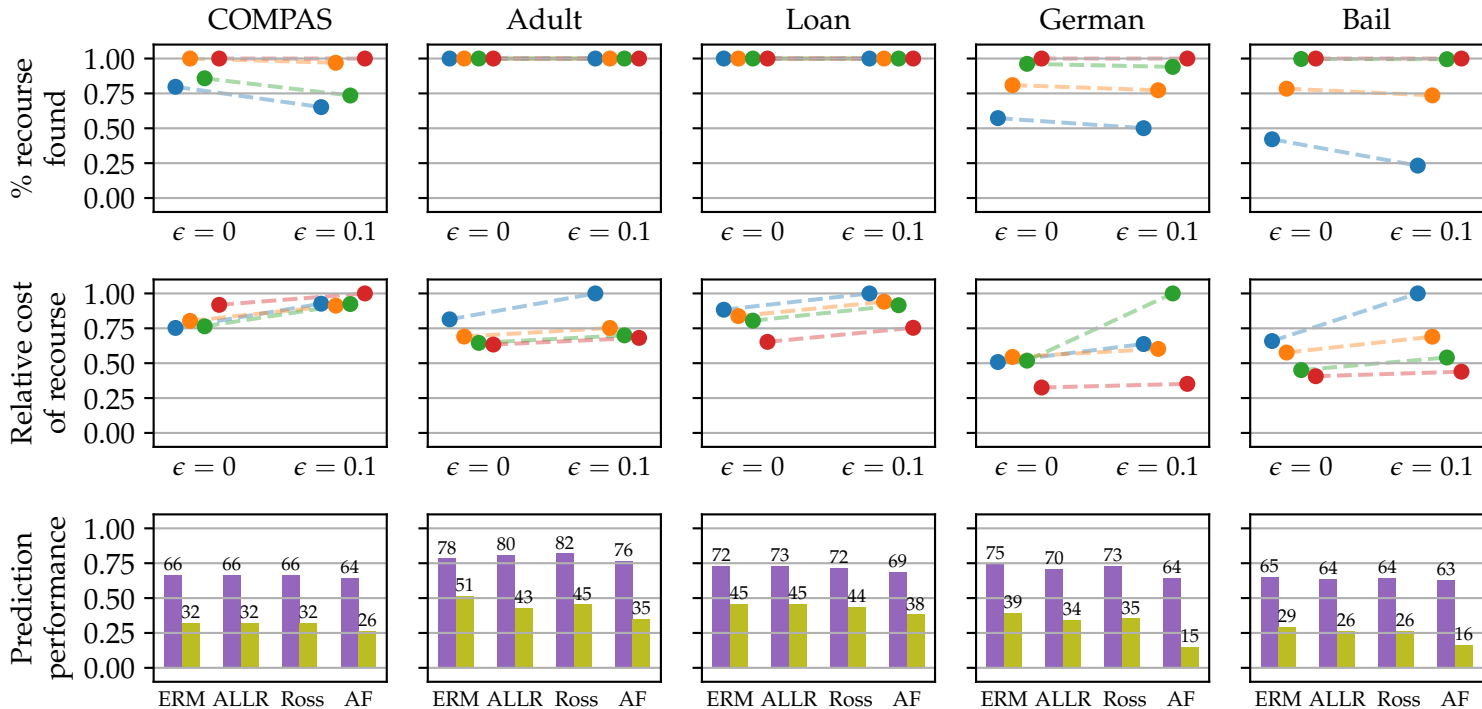

Supplement: supplementary_material [file attachment]

Magnitude of min. perturbation invalidating recourse

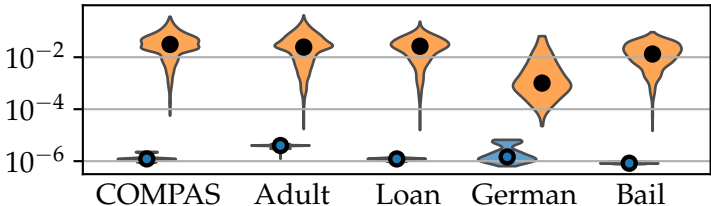

Supplement: supplementary_material [file attachment]

# Ablation study - NN classifiers

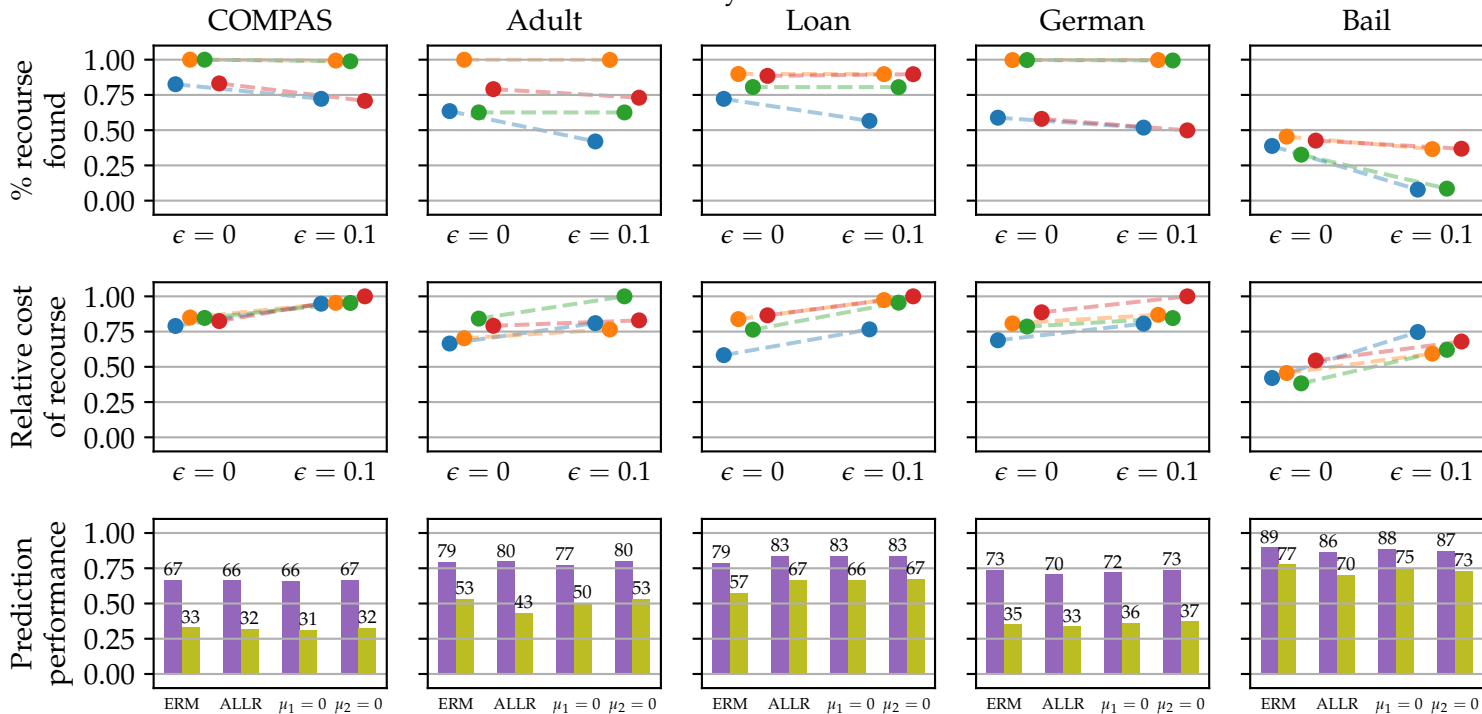

Supplement: supplementary_material [file attachment]

# NN classifiers

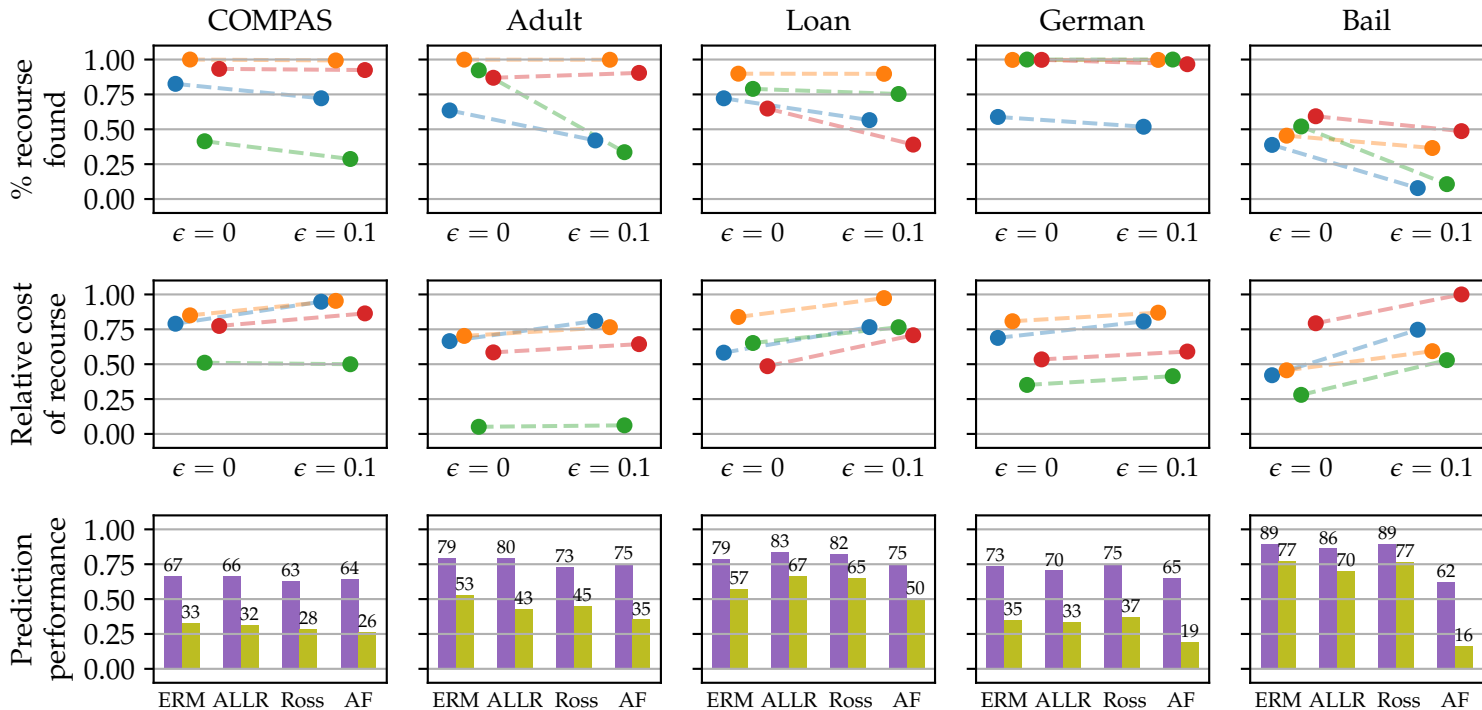

Supplement: supplementary_material [file attachment]
